# Supplementary material for: Large and forgotten in rural Australia: assessment, attitudes and possible approaches to losing weight in young adult males
Source: PubMed Central journal article supplement (PMC4008138; doi:10.1186/1471-2458-14-243), 2014-03-11
Supplement: 1471-2458-14-243-S1.pdf [file 1471-2458-14-243-S1.pdf]

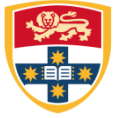

**INVESTIGATORS**

Dr Kumara Mendis  
Associate Professor Anthony Brown  
Professor Katharine Steinbeck  
Mrs Karen Paxton

11 Moran Drive  
PO Box 1043  
DUBBO NSW 2830  
Telephone: +61 2 6885 7977  
Facsimile: +61 2 6885 7979

Email: [kumara.mendis@sydney.edu.au](mailto:kumara.mendis@sydney.edu.au)

**TITLE: Dubbo Young Adult Males Focus Group and Interview Study (DYFIS):  
Will text messages and incentives help promote weight loss?**

**FOCUS GROUP and INTERVIEW QUESTIONS**

**Interview protocol (questions, discussion – prompts (PRT) & probes (PRO))**

- 1) What are your views about overweight/obesity (OWOB)?**  
PRT/PRO
  - a. Is OWOB a problem? (health/ social problem?)
  - b. How relevant is OWOB to you?
  - c. Have you ever tried to lose weight? What did you do?/ how well did it work?
  - d. What do you think causes OWOB?
  - e. Would OWOB cause any health problems for young men like you?
- 2) How do you think we could promote**
  - a. Healthy eating, regular exercise, other measures
- 3) What will motivate you to lose weight?**  
PRT/PRO
  - a. What would influence you to lose weight?
  - b. What do you think is a realistic weight loss per month if one is actively trying to lose weight?
  - c. What type of incentives would you be interested? - e.g. movie tickets, gift vouchers, running shoes, gym memberships, cash
  - d. If you are interested in cash payment as incentives what (reasonable) amount would be adequate
- 4) What do you think about using text messages to promote weight loss?**  
PRT/PRO
  - a. What kind of TEXT messages would you be interested?
  - b. Text messages – a good way of communicating about healthy eating?
  - c. Text messages – a good way of communicating about regular exercise?
  - d. How frequent would you like to receive health promotion Text message?
  - e. Would you let others know if you were doing something positive regarding your health? e.g. exercising, having fruits (using TWITTER?)
  - f. Would it be a problem if we call you on your mobile regarding health promotion
- 5) How can we recruit people like you to a study similar to this?**  
PRT/PRO
  - a. What would make you want to be involved in a study like this?
  - b. Would you tell a friend about this study?
  - c. Where can we recruit young adult males for a study like this?
- 6) Would you like to know the results of this Focus Group Study? How?**
- 7) Any other issues you would like to raise/discuss?**
